# Supplementary material for: H55N polymorphism is associated with low citrate synthase activity which regulates lipid metabolism in mouse muscle cells
Source: PubMed Central journal article supplement (PMC5667803; doi:10.1371/journal.pone.0185789), 2017-11-02
Supplement: pone.0185789.s001.pdf [file pone.0185789.s001.pdf]

**S1 Table. Supporting data for Fig. 1A.**

| <b>Samples</b> | <b>Balb</b> | <b>B6</b> | <b>B6/B.A</b> | <b>B6.A</b> | <b>A/J</b> |
|----------------|-------------|-----------|---------------|-------------|------------|
| 1              | 3271        | 3366      | 2225          | 2998        | 1709       |
| 2              | 3174        | 4070      | 1936          | 2401        | 2086       |
| 3              | 3469        | 2379      | 2169          | 2318        | 1386       |
| 4              | 3533        | 3222      | 2295          | 2273        | 2344       |
| 5              | 3281        | 3294      | 2525          | 1778        | 1578       |
| 6              | 3417        | 3048      | 2635          | 2446        | 2042       |
| 7              |             | 3605      | 1881          | 1408        |            |
| 8              |             | 4852      | 1988          | 1688        |            |
| 9              |             | 4316      | 2527          | 1492        |            |
| 10             |             | 3442      |               | 2896        |            |
| 11             |             | 2691      |               | 1896        |            |

|    |  |      |  |      |  |
|----|--|------|--|------|--|
|    |  |      |  |      |  |
| 12 |  | 2246 |  | 1271 |  |
| 13 |  | 2236 |  | 1460 |  |
