# Supplementary material for: H55N polymorphism is associated with low citrate synthase activity which regulates lipid metabolism in mouse muscle cells
Source: PubMed Central journal article supplement (PMC5667803; doi:10.1371/journal.pone.0185789), 2017-11-02
Supplement: pone.0185789.s002.pdf [file pone.0185789.s002.pdf]

**S2 Table. Supporting data for Fig. 1B.**

| <b>Samples</b> | <b>Balb</b> | <b>B6</b> | <b>B6/B6.A</b> | <b>B6.A</b> | <b>A/J</b> |
|----------------|-------------|-----------|----------------|-------------|------------|
| <b>1</b>       | 241         | 354       | 223            | 173         | 224        |
| <b>2</b>       | 277         | 239       | 204            | 162         | 170        |
| <b>3</b>       | 371         | 301       | 202            | 137         | 192        |
| <b>4</b>       | 341         | 308       | 175            | 185         | 149        |
| <b>5</b>       | 320         | 324       | 238            | 210         | 199        |
| <b>6</b>       | 265         | 337       | 235            | 222         | 228        |
| <b>7</b>       |             | 241       | 241            | 216         |            |
| <b>8</b>       |             | 185       | 197            | 194         |            |
| <b>9</b>       |             | 185       | 183            | 264         |            |
| <b>10</b>      |             | 245       |                | 244         |            |
| <b>11</b>      |             | 354       |                | 215         |            |

|           |  |     |  |     |  |
|-----------|--|-----|--|-----|--|
|           |  |     |  |     |  |
| <b>12</b> |  | 272 |  | 197 |  |
| <b>13</b> |  | 311 |  | 205 |  |
