# Supplementary material for: H55N polymorphism is associated with low citrate synthase activity which regulates lipid metabolism in mouse muscle cells
Source: PubMed Central journal article supplement (PMC5667803; doi:10.1371/journal.pone.0185789), 2017-11-02
Supplement: pone.0185789.s003.pdf [file pone.0185789.s003.pdf]

**S3 Table. Supporting data for Fig. 1C.**

| <b>Samples</b> | <b>Balb</b> | <b>B6</b> | <b>B6/B6.A</b> | <b>B6.A</b> | <b>A/J</b> |
|----------------|-------------|-----------|----------------|-------------|------------|
| <b>1</b>       | 410         | 809       | 400            | 306         | 249        |
| <b>2</b>       | 893         | 696       | 581            | 346         | 293        |
| <b>3</b>       |             | 616       | 346            | 344         | 264        |
| <b>4</b>       | 643         | 610       | 577            | 350         | 388        |
| <b>5</b>       | 644         | 478       | 540            | 382         | 197        |
| <b>6</b>       | 835         | 608       | 461            | 330         | 244        |
| <b>7</b>       | 839         | 686       | 388            | 385         | 233        |
| <b>8</b>       |             | 553       | 463            | 696         |            |
| <b>9</b>       |             | 352       | 459            | 403         |            |
| <b>10</b>      |             | 387       |                | 660         |            |
| <b>11</b>      |             | 538       |                | 356         |            |
| <b>12</b>      |             | 568       |                | 353         |            |
| <b>13</b>      |             | 723       |                | 352         |            |
