# Supplementary material for: H55N polymorphism is associated with low citrate synthase activity which regulates lipid metabolism in mouse muscle cells
Source: PubMed Central journal article supplement (PMC5667803; doi:10.1371/journal.pone.0185789), 2017-11-02
Supplement: pone.0185789.s004.pdf [file pone.0185789.s004.pdf]

**S4 Table. Supporting data for Fig. 2C.**

**B6 construct**

| <b>Samples:</b>   | <b>1</b> | <b>2</b> | <b>3</b> | <b>4</b> |
|-------------------|----------|----------|----------|----------|
| <b>Fraction 1</b> | 312      | 281      | 216      | 228      |
| <b>Fraction 2</b> | 165      | 189      | 190      | 179      |
| <b>Fraction 3</b> | 102      | 123      | 165      | 148      |
| <b>Fraction 4</b> | 41       | 87       | 107      | 33       |
| <b>Fraction 5</b> | 18       | 14       | 23       | 3        |

**A/J construct**

| <b>Samples:</b>   | <b>1</b> | <b>2</b> | <b>3</b> | <b>4</b> |
|-------------------|----------|----------|----------|----------|
| <b>Fraction 1</b> | 292      | 204      | 193      | 172      |
| <b>Fraction 2</b> | 250      | 133      | 155      | 77       |
| <b>Fraction 3</b> | 117      | 108      | 51       | 11       |
| <b>Fraction 4</b> | 40       | 69       | 24       | 2        |
| <b>Fraction 5</b> | 2        | 28       | 8        | 2        |
