# Supplementary material for: H55N polymorphism is associated with low citrate synthase activity which regulates lipid metabolism in mouse muscle cells
Source: PubMed Central journal article supplement (PMC5667803; doi:10.1371/journal.pone.0185789), 2017-11-02
Supplement: pone.0185789.s005.pdf [file pone.0185789.s005.pdf]

**S5 Table. Supporting data for Fig. 3A.**

| <b>Samples:</b> | <b>Con shRNA</b> | <b>Cs shRNA</b> |
|-----------------|------------------|-----------------|
| <b>1</b>        | 246              | 120             |
| <b>2</b>        | 326              | 152             |
| <b>3</b>        | 370              | 153             |
| <b>4</b>        | 270              | 115             |
| <b>5</b>        | 335              | 145             |
| <b>6</b>        | 400              | 177             |
| <b>7</b>        | 427              | 143             |
| <b>8</b>        | 348              | 155             |
| <b>9</b>        | 266              | 128             |
