# Supplementary material for: H55N polymorphism is associated with low citrate synthase activity which regulates lipid metabolism in mouse muscle cells
Source: PubMed Central journal article supplement (PMC5667803; doi:10.1371/journal.pone.0185789), 2017-11-02
Supplement: pone.0185789.s006.pdf [file pone.0185789.s006.pdf]

**S6 Table. Supporting data for Fig. 3B.**

| <b>Samples:</b> | <b>Con shRNA</b> | <b>Cs shRNA</b> |
|-----------------|------------------|-----------------|
| <b>1</b>        | 0.068            | 0.081           |
| <b>2</b>        | 0.087            | 0.137           |
| <b>3</b>        | 0.191            | 0.143           |
| <b>4</b>        | 0.337            | 0.096           |
| <b>5</b>        | 0.322            | 0.114           |
| <b>6</b>        | 0.268            | 0.083           |
| <b>7</b>        | 0.302            | 0.034           |
| <b>8</b>        | 0.127            | 0.018           |
| <b>9</b>        | 0.234            | 0.016           |
