# Supplementary material for: H55N polymorphism is associated with low citrate synthase activity which regulates lipid metabolism in mouse muscle cells
Source: PubMed Central journal article supplement (PMC5667803; doi:10.1371/journal.pone.0185789), 2017-11-02
Supplement: pone.0185789.s007.pdf [file pone.0185789.s007.pdf]

**S7 Table. Supporting data for Fig. 3C.**

| <b>Samples:</b> | <b>Con shRNA</b> | <b>Cs shRNA</b> |
|-----------------|------------------|-----------------|
| <b>1</b>        | 3.23             | 3.88            |
| <b>2</b>        | 5.81             | 6.13            |
| <b>3</b>        | 6.53             | 6.06            |
| <b>4</b>        | 5.39             | 5.30            |
| <b>5</b>        | 6.36             | 5.62            |
| <b>6</b>        | 7.41             | 6.08            |
| <b>7</b>        | 7.97             | 5.49            |
| <b>8</b>        | 7.34             | 7.69            |
| <b>9</b>        | 5.13             | 5.81            |
