# Supplementary material for: H55N polymorphism is associated with low citrate synthase activity which regulates lipid metabolism in mouse muscle cells
Source: PubMed Central journal article supplement (PMC5667803; doi:10.1371/journal.pone.0185789), 2017-11-02
Supplement: pone.0185789.s009.pdf [file pone.0185789.s009.pdf]

**S9 Table. Supporting data for Fig. 3E**

| <b>Days</b> | <b>Con shRNA</b> |        |        |        | <b>Days</b> | <b>Cs shRNA</b> |        |        |        |
|-------------|------------------|--------|--------|--------|-------------|-----------------|--------|--------|--------|
| <b>0</b>    | 0                | 0      | 0      | 0      | <b>0</b>    | 0               | 0      | 0      | 0      |
| <b>0.5</b>  | 0.3905           | 0.2676 | 0.2297 | 0.2495 | <b>0.5</b>  | 0.4298          | 0.3089 | 0.2945 | 0.6409 |
| <b>1</b>    | 0.4735           | 0.29   | 0.2541 | 0.3245 | <b>1</b>    | 0.5028          | 0.3501 | 0.3773 | 0.9614 |
| <b>1.5</b>  | 0.5303           | 0.2797 | 0.302  | 0.3687 | <b>1.5</b>  | 0.7692          | 0.4646 | 0.4722 | 1.3941 |
| <b>2</b>    | 0.7606           | 0.3713 | 0.4238 | 0.516  | <b>2</b>    | 1.4621          | 0.7099 | 0.7321 | 1.5214 |
| <b>2.5</b>  | 1.2968           | 0.8332 | 0.7313 | 0.7865 | <b>2.5</b>  | 2.2737          | 1.1865 | 1.3796 | 2.8051 |
| <b>3</b>    | 2.2069           | 1.4621 | 1.2956 | 1.5204 | <b>3</b>    | 3.6107          | 2.0611 | 2.4734 | 3.6483 |
| <b>3.5</b>  | 2.5151           | 1.852  | 1.7561 | 1.8827 | <b>3.5</b>  | 3.7987          | 2.5597 | 2.8689 | 3.3208 |
| <b>4</b>    | 3.8981           | 3.0385 | 2.9285 | 3.182  | <b>4</b>    | 5.0792          | 4.3654 | 4.8448 | 3.6631 |
| <b>4.5</b>  | 3.6694           | 3.2092 | 3.3589 | 2.9928 | <b>4.5</b>  | 4.0801          | 3.8902 | 4.1181 | 2.8863 |
| <b>5</b>    | 4.237            | 4.1993 | 4.486  | 3.7833 | <b>5</b>    | 4.4633          | 4.5655 | 4.7383 | 3.2805 |
| <b>5.5</b>  | 3.5481           | 3.4889 | 3.8653 | 3.1638 | <b>5.5</b>  | 3.5443          | 3.6794 | 3.839  | 2.8256 |
| <b>6</b>    | 3.8583           | 3.9062 | 4.1474 | 3.7171 | <b>6</b>    | 3.7581          | 4.0745 | 4.0472 | 3.2121 |
| <b>6.5</b>  | 3.1586           | 3.1821 | 3.4056 | 2.9746 | <b>6.5</b>  | 3.1122          | 3.3333 | 3.3584 | 2.9298 |
| <b>7</b>    | 3.541            | 3.3427 | 3.846  | 3.2216 | <b>7</b>    | 3.5983          | 3.623  | 3.5931 | 3.6169 |

|             |        |        |        |        |             |        |        |        |        |
|-------------|--------|--------|--------|--------|-------------|--------|--------|--------|--------|
| <b>7.5</b>  | 3.0646 | 3.206  | 3.3347 | 3.0872 | <b>7.5</b>  | 3.1561 | 3.2563 | 3.0395 | 3.0925 |
| <b>8</b>    | 3.3071 | 3.5622 | 3.4518 | 3.5668 | <b>8</b>    | 3.7875 | 3.4667 | 3.314  | 3.5678 |
| <b>8.33</b> | 3.2285 | 3.4081 | 3.4096 | 3.35   | <b>8.33</b> | 3.2585 | 3.2132 | 3.0279 | 3.0526 |
