# Supplementary material for: H55N polymorphism is associated with low citrate synthase activity which regulates lipid metabolism in mouse muscle cells
Source: PubMed Central journal article supplement (PMC5667803; doi:10.1371/journal.pone.0185789), 2017-11-02
Supplement: pone.0185789.s010.pdf [file pone.0185789.s010.pdf]

**S10 Table. Supporting data for Fig. 4A**

|                | <b>P-AMPK/AMPK</b> |                 |
|----------------|--------------------|-----------------|
| <b>Samples</b> | <b>Con shRNA</b>   | <b>Cs shRNA</b> |
| <b>1</b>       | 1.55               | 1.16            |
| <b>2</b>       | 1.43               | 1.37            |
| <b>3</b>       | 1.07               | 1.28            |
| <b>4</b>       | 0.96               | 0.79            |
| <b>5</b>       | 1.08               | 0.92            |
| <b>6</b>       | 1.05               | 0.78            |
| <b>7</b>       | 0.96               | 0.59            |
| <b>8</b>       | 0.80               | 0.69            |
