# Supplementary material for: H55N polymorphism is associated with low citrate synthase activity which regulates lipid metabolism in mouse muscle cells
Source: PubMed Central journal article supplement (PMC5667803; doi:10.1371/journal.pone.0185789), 2017-11-02
Supplement: pone.0185789.s011.pdf [file pone.0185789.s011.pdf]

**S11 Table. Supporting data for Fig. 4B**

|                | <b>P-ACC/ACC</b> |                 |
|----------------|------------------|-----------------|
| <b>Samples</b> | <b>Con shRNA</b> | <b>Cs shRNA</b> |
| <b>1</b>       | 1.98             | 1.76            |
| <b>2</b>       | 1.65             | 1.81            |
| <b>3</b>       | 1.45             | 2.32            |
| <b>4</b>       | 3.16             | 5.24            |
| <b>5</b>       | 3.31             | 5.00            |
| <b>6</b>       | 2.79             | 2.02            |
| <b>7</b>       | 2.84             | 1.74            |
| <b>8</b>       | 3.24             | 3.17            |
