# Supplementary material for: H55N polymorphism is associated with low citrate synthase activity which regulates lipid metabolism in mouse muscle cells
Source: PubMed Central journal article supplement (PMC5667803; doi:10.1371/journal.pone.0185789), 2017-11-02
Supplement: pone.0185789.s012.pdf [file pone.0185789.s012.pdf]

**S12 Table. Supporting data for Fig. 4C**

|                | <b>P-p38/p38</b> |                 |
|----------------|------------------|-----------------|
| <b>Samples</b> | <b>Con shRNA</b> | <b>Cs shRNA</b> |
| <b>1</b>       | 0.619            | 0.698           |
| <b>2</b>       | 0.612            | 0.743           |
| <b>3</b>       | 0.576            | 1.418           |
| <b>4</b>       | 1.366            | 0.618           |
| <b>5</b>       | 0.773            | 0.687           |
| <b>6</b>       | 0.577            | 0.869           |
| <b>7</b>       | 0.916            | 0.881           |
| <b>8</b>       | 0.788            | 0.948           |
