# Supplementary material for: H55N polymorphism is associated with low citrate synthase activity which regulates lipid metabolism in mouse muscle cells
Source: PubMed Central journal article supplement (PMC5667803; doi:10.1371/journal.pone.0185789), 2017-11-02
Supplement: pone.0185789.s013.pdf [file pone.0185789.s013.pdf]

**S13 Table. Supporting data for Fig. 4D**

|                | <b>P-mTOR/mTOR</b> |                 |
|----------------|--------------------|-----------------|
| <b>Samples</b> | <b>Con shRNA</b>   | <b>Cs shRNA</b> |
| <b>1</b>       | 1.85               | 1.14            |
| <b>2</b>       | 1.70               | 1.13            |
| <b>3</b>       | 1.03               | 0.68            |
| <b>4</b>       | 0.70               | 0.92            |
| <b>5</b>       | 0.83               | 1.29            |
| <b>6</b>       | 0.98               | 1.08            |
| <b>7</b>       | 1.11               | 1.43            |
| <b>8</b>       | 1.46               | 0.40            |
