# Supplementary material for: H55N polymorphism is associated with low citrate synthase activity which regulates lipid metabolism in mouse muscle cells
Source: PubMed Central journal article supplement (PMC5667803; doi:10.1371/journal.pone.0185789), 2017-11-02
Supplement: pone.0185789.s014.pdf [file pone.0185789.s014.pdf]

**S14 Table. Supporting data for Fig. 5A**

**Con shRNA cells**

| <b>Time (min)</b> | <b>1</b> | <b>2</b> | <b>3</b> | <b>4</b> | <b>5</b> | <b>6</b> | <b>7</b> | <b>8</b> | <b>9</b> | <b>10</b> |
|-------------------|----------|----------|----------|----------|----------|----------|----------|----------|----------|-----------|
| <b>9</b>          | 215      | 318      | 503      | 296      | 276      | 240      | 143      | 298      | 272      | 305       |
| <b>18</b>         | 248      | 343      | 616      | 304      | 285      | 243      | 112      | 293      | 290      | 328       |
| <b>27</b>         | 255      | 367      | 583      | 296      | 305      | 259      | 110      | 307      | 300      | 297       |
| <b>36</b>         | 100      | 116      | 314      | 100      | 150      | 136      | 99       | 96       | 104      | 124       |
| <b>45</b>         | 116      | 153      | 358      | 182      | 186      | 148      | 91       | 111      | 144      | 155       |
| <b>54</b>         | 128      | 160      | 369      | 207      | 198      | 136      | 75       | 108      | 135      | 134       |
| <b>63</b>         | 519      | 488      | 846      | 539      | 613      | 459      | 301      | 499      | 562      | 621       |
| <b>72</b>         | 459      | 424      | 807      | 429      | 490      | 619      | 297      | 414      | 528      | 574       |
| <b>81</b>         | 366      | 314      | 677      | 369      | 408      | 492      | 227      | 300      | 414      | 460       |
| <b>90</b>         | 37       | 22       | 241      | 79       | 51       | 60       | 16       | 18       | 45       | 32        |
| <b>99</b>         | 48       | 50       | 236      | 107      | 63       | 73       | 35       | 11       | 37       | 52        |
| <b>108</b>        | 81       | 79       | 261      | 131      | 82       | 77       | 59       | 35       | 67       | 64        |

**S14 Table. Supporting data for Fig. 5A (continued)**

**Cs shRNA cells:**

| <b>Time (min)</b> | <b>1</b> | <b>2</b> | <b>3</b> | <b>4</b> | <b>5</b> | <b>6</b> | <b>7</b> | <b>8</b> | <b>9</b> | <b>10</b> |
|-------------------|----------|----------|----------|----------|----------|----------|----------|----------|----------|-----------|
| <b>9</b>          | 155      | 153      | 100      | 207      | 150      | 222      | 274      | 223      | 302      | 223       |
| <b>18</b>         | 154      | 181      | 169      | 194      | 175      | 263      | 289      | 371      | 427      | 231       |
| <b>27</b>         | 162      | 178      | 187      | 206      | 170      | 261      | 299      | 354      | 379      | 224       |
| <b>36</b>         | 32       | 38       | 144      | 141      | 146      | 154      | 185      | 212      | 235      | 70        |
| <b>45</b>         | 57       | 73       | 146      | 165      | 158      | 157      | 184      | 233      | 256      | 90        |
| <b>54</b>         | 66       | 64       | 146      | 190      | 153      | 153      | 174      | 211      | 246      | 90        |
| <b>63</b>         | 26       | 212      | 136      | 766      | 316      | 538      | 685      | 611      | 513      | 548       |
| <b>72</b>         | 26       | 180      | 127      | 696      | 293      | 397      | 565      | 596      | 464      | 444       |
| <b>81</b>         | 25       | 145      | 115      | 596      | 250      | 339      | 498      | 517      | 386      | 363       |
| <b>90</b>         | 0        | 11       | 99       | 62       | 113      | 116      | 188      | 116      | 191      | 41        |
| <b>99</b>         | 8        | 32       | 113      | 71       | 117      | 112      | 174      | 121      | 192      | 43        |

|            |    |    |     |    |     |     |     |     |     |    |
|------------|----|----|-----|----|-----|-----|-----|-----|-----|----|
| <b>108</b> | 31 | 35 | 146 | 99 | 136 | 127 | 182 | 137 | 217 | 67 |
|------------|----|----|-----|----|-----|-----|-----|-----|-----|----|
