# Supplementary material for: H55N polymorphism is associated with low citrate synthase activity which regulates lipid metabolism in mouse muscle cells
Source: PubMed Central journal article supplement (PMC5667803; doi:10.1371/journal.pone.0185789), 2017-11-02
Supplement: pone.0185789.s015.pdf [file pone.0185789.s015.pdf]

**S15 Table. Supporting data for Fig. 5B****Con shRNA cells:**

| <b>Time (min)</b> | <b>1</b> | <b>2</b> | <b>3</b> | <b>4</b> | <b>5</b> | <b>6</b> | <b>7</b> | <b>8</b> | <b>9</b> | <b>10</b> |
|-------------------|----------|----------|----------|----------|----------|----------|----------|----------|----------|-----------|
| <b>9</b>          | 180      | 147      | 192      | 124      | 167      | 116      | 186      | 112      | 203      | 245       |
| <b>18</b>         | 172      | 146      | 172      | 123      | 173      | 113      | 184      | 109      | 200      | 237       |
| <b>27</b>         | 165      | 150      | 172      | 125      | 158      | 120      | 180      | 106      | 182      | 223       |
| <b>36</b>         | 235      | 219      | 355      | 230      | 248      | 217      | 320      | 237      | 329      | 382       |
| <b>45</b>         | 251      | 238      | 372      | 237      | 253      | 239      | 337      | 231      | 340      | 395       |
| <b>54</b>         | 241      | 226      | 366      | 236      | 247      | 242      | 322      | 242      | 354      | 396       |
| <b>63</b>         | 228      | 225      | 293      | 205      | 402      | 216      | 306      | 228      | 360      | 389       |
| <b>72</b>         | 232      | 228      | 1348     | 198      | 386      | 212      | 281      | 229      | 353      | 372       |
| <b>81</b>         | 231      | 218      | 1331     | 195      | 403      | 203      | 275      | 226      | 330      | 348       |
| <b>90</b>         | 186      | 186      | 1165     | 172      | 246      | 179      | 280      | 209      | 270      | 314       |
| <b>99</b>         | 212      | 196      | 1151     | 236      | 222      | 196      | 283      | 227      | 295      | 317       |
| <b>108</b>        | 191      | 189      | 1109     | 185      | 224      | 199      | 252      | 212      | 281      | 303       |

**Cs shRNA cells:**

| <b>Time (min)</b> | <b>1</b> | <b>2</b> | <b>3</b> | <b>4</b> | <b>5</b> | <b>6</b> | <b>7</b> | <b>8</b> | <b>9</b> | <b>10</b> |
|-------------------|----------|----------|----------|----------|----------|----------|----------|----------|----------|-----------|
| <b>9</b>          | 337      | 180      | 332      | 260      | 150      | 194      | 221      | 250      | 257      | 261       |
| <b>18</b>         | 338      | 186      | 404      | 310      | 170      | 195      | 223      | 251      | 247      | 275       |
| <b>27</b>         | 348      | 192      | 397      | 248      | 152      | 201      | 222      | 256      | 237      | 271       |
| <b>36</b>         | 341      | 238      | 312      | 385      | 176      | 353      | 362      | 270      | 312      | 372       |
| <b>45</b>         | 417      | 235      | 317      | 403      | 207      | 373      | 375      | 305      | 327      | 372       |
| <b>54</b>         | 401      | 227      | 313      | 365      | 206      | 361      | 363      | 307      | 358      | 385       |

|            |     |     |     |     |     |     |     |     |     |     |
|------------|-----|-----|-----|-----|-----|-----|-----|-----|-----|-----|
| <b>63</b>  | 357 | 248 | 263 | 419 | 285 | 370 | 439 | 321 | 508 | 856 |
| <b>72</b>  | 362 | 260 | 282 | 402 | 219 | 363 | 567 | 319 | 534 | 875 |
| <b>81</b>  | 365 | 250 | 265 | 384 | 211 | 349 | 518 | 299 | 506 | 857 |
| <b>90</b>  | 336 | 268 | 278 | 359 | 182 | 420 | 437 | 279 | 469 | 865 |
| <b>99</b>  | 398 | 274 | 264 | 390 | 204 | 447 | 477 | 315 | 541 | 856 |
| <b>108</b> | 347 | 280 | 256 | 396 | 198 | 391 | 436 | 322 | 506 | 833 |
