# Supplementary material for: H55N polymorphism is associated with low citrate synthase activity which regulates lipid metabolism in mouse muscle cells
Source: PubMed Central journal article supplement (PMC5667803; doi:10.1371/journal.pone.0185789), 2017-11-02
Supplement: pone.0185789.s016.pdf [file pone.0185789.s016.pdf]

**S16 Table. Supporting data for Fig. 5C**

**Con shRNA cells**

|                                   | <b>1</b> | <b>2</b> | <b>3</b> | <b>4</b> | <b>5</b> | <b>6</b> | <b>7</b> | <b>8</b> | <b>9</b> | <b>10</b> |
|-----------------------------------|----------|----------|----------|----------|----------|----------|----------|----------|----------|-----------|
| <b>Basal Rate</b>                 | 184      | 292      | 321      | 193      | 223      | 178      | 85       | 278      | 238      | 261       |
| <b>Maximal Respiration Rate</b>   | 393      | 358      | 530      | 340      | 438      | 454      | 238      | 383      | 452      | 503       |
| <b>Spare Respiratory Capacity</b> | 16       | 80       | 27       | 165      | 307      | 401      | 450      | 254      | 401      | 242       |

**Cs shRNA cells**

|                                   | <b>1</b> | <b>2</b> | <b>3</b> | <b>4</b> | <b>5</b> | <b>6</b> | <b>7</b> | <b>8</b> | <b>9</b> | <b>10</b> |
|-----------------------------------|----------|----------|----------|----------|----------|----------|----------|----------|----------|-----------|
| <b>Basal Rate</b>                 | 144      | 145      | 33       | 125      | 43       | 131      | 106      | 192      | 169      | 176       |
| <b>Maximal Respiration Rate</b>   | 16       | 80       | 27       | 165      | 307      | 401      | 450      | 254      | 401      | 0         |
| <b>Spare Respiratory Capacity</b> | 8        | 122      | 176      | 85       | 0        | 0        | 0        | 0        | 0        | 0         |
