# Supplementary material for: H55N polymorphism is associated with low citrate synthase activity which regulates lipid metabolism in mouse muscle cells
Source: PubMed Central journal article supplement (PMC5667803; doi:10.1371/journal.pone.0185789), 2017-11-02
Supplement: pone.0185789.s017.pdf [file pone.0185789.s017.pdf]

**S17 Table. Supporting data for Fig. 5D**

**Con shRNA cells**

|                                      | <b>1</b> | <b>2</b> | <b>3</b> | <b>4</b> | <b>5</b> | <b>6</b> | <b>7</b> | <b>8</b> | <b>9</b> | <b>10</b> |
|--------------------------------------|----------|----------|----------|----------|----------|----------|----------|----------|----------|-----------|
| <b>Proton Leak</b>                   | 59       | 93       | 101      | 57       | 113      | 70       | 52       | 84       | 78       | 89        |
| <b>ATP Production</b>                | 125      | 199      | 221      | 136      | 111      | 108      | 34       | 194      | 160      | 172       |
| <b>Non-mitochondrial respiration</b> | 55       | 50       | 0        | 106      | 65       | 70       | 37       | 21       | 50       | 49        |

**Cs shRNA cells**

|                                      | <b>1</b> | <b>2</b> | <b>3</b> | <b>4</b> | <b>5</b> | <b>6</b> | <b>7</b> | <b>8</b> | <b>9</b> | <b>10</b> |
|--------------------------------------|----------|----------|----------|----------|----------|----------|----------|----------|----------|-----------|
| <b>Proton Leak</b>                   | 39       | 32       | 27       | 88       | 30       | 37       | 7        | 94       | 45       | 33        |
| <b>ATP Production</b>                | 105      | 113      | 7        | 37       | 13       | 94       | 99       | 97       | 124      | 142       |
| <b>Non-mitochondrial respiration</b> | 13       | 26       | 119      | 78       | 122      | 118      | 181      | 125      | 200      | 50        |
