# Supplementary material for: H55N polymorphism is associated with low citrate synthase activity which regulates lipid metabolism in mouse muscle cells
Source: PubMed Central journal article supplement (PMC5667803; doi:10.1371/journal.pone.0185789), 2017-11-02
Supplement: pone.0185789.s018.pdf [file pone.0185789.s018.pdf]

**S18 Table. Supporting data for Fig. 6A**

**Con shRNA cells**

|            | <b>1</b> | <b>2</b> | <b>3</b> | <b>4</b> | <b>5</b> | <b>6</b> |
|------------|----------|----------|----------|----------|----------|----------|
| <b>P</b>   | 2.75     | 7.32     | 3.33     | 3.24     | 6.84     | 3.66     |
| <b>G+P</b> | 2.44     | 4.16     | 2.05     | 2.24     | 3.95     | 2.06     |

**Cs shRNA cells**

|            | <b>1</b> | <b>2</b> | <b>3</b> | <b>4</b> | <b>5</b> | <b>6</b> |
|------------|----------|----------|----------|----------|----------|----------|
| <b>P</b>   | 2.24     | 7.74     | 2.39     | 3.78     | 5.63     | 2.52     |
| <b>G+P</b> | 0.63     | 2.70     | 1.21     | 1.39     | 2.59     | 0.85     |
