# Supplementary material for: H55N polymorphism is associated with low citrate synthase activity which regulates lipid metabolism in mouse muscle cells
Source: PubMed Central journal article supplement (PMC5667803; doi:10.1371/journal.pone.0185789), 2017-11-02
Supplement: pone.0185789.s019.pdf [file pone.0185789.s019.pdf]

**S19 Table. Supporting data for Fig. 6B**

**Con shRNA cells**

|            | <b>1</b> | <b>2</b> | <b>3</b> | <b>4</b> | <b>5</b> | <b>6</b> |
|------------|----------|----------|----------|----------|----------|----------|
| <b>P</b>   | 0.86     | 1.77     | 1.02     | 0.80     | 1.79     | 1.02     |
| <b>P+G</b> | 1.24     | 3.20     | 1.84     | 1.11     | 0.00     | 2.08     |

**Cs shRNA cells**

|            | <b>1</b> | <b>2</b> | <b>3</b> | <b>4</b> | <b>5</b> | <b>6</b> |
|------------|----------|----------|----------|----------|----------|----------|
| <b>P</b>   | 0.71     | 1.57     | 0.89     | 0.67     | 1.25     | 0.94     |
| <b>G+P</b> | 1.15     | 1.71     | 1.79     | 1.16     | 1.87     | 1.67     |
