# Supplementary material for: H55N polymorphism is associated with low citrate synthase activity which regulates lipid metabolism in mouse muscle cells
Source: PubMed Central journal article supplement (PMC5667803; doi:10.1371/journal.pone.0185789), 2017-11-02
Supplement: pone.0185789.s020.pdf [file pone.0185789.s020.pdf]

**S20 Table. Supporting data for Fig. 7B**

**3 hours after incubation**

| <b>Con shRNA:</b> | <b>1</b> | <b>2</b> | <b>3</b> | <b>4</b> | <b>5</b> | <b>6</b> | <b>7</b> | <b>8</b> | <b>9</b> |
|-------------------|----------|----------|----------|----------|----------|----------|----------|----------|----------|
| <b>P</b>          | 0.74     | 0.61     | 1.02     | 0.44     | 0.90     | 0.53     | 1.24     | 0.28     | 0.86     |
| <b>G+P</b>        | 0.60     | 0.83     | 0.98     | 0.52     | 0.23     | 0.23     | 0.71     | 2.19     | 0.57     |
| <b>Cs shRNA:</b>  | <b>1</b> | <b>2</b> | <b>3</b> | <b>4</b> | <b>5</b> | <b>6</b> | <b>7</b> | <b>8</b> | <b>9</b> |
| <b>P</b>          | 0.02     | 0.48     | 0.42     | 0.24     | 0.98     | 0.57     | 1.81     | 0.23     | 0.90     |
| <b>G+P</b>        | 0.34     | 0.48     | 0.72     | 0.53     | 0.75     | 0.47     | 0.77     | 0.20     | 1.08     |

**12 hours after incubation**

| <b>Con shRNA:</b> | <b>1</b> | <b>2</b> | <b>3</b> | <b>4</b> | <b>5</b> | <b>6</b> | <b>7</b> | <b>8</b> | <b>9</b> |
|-------------------|----------|----------|----------|----------|----------|----------|----------|----------|----------|
| <b>P</b>          | 0.43     | 0.45     | 0.12     | 0.37     | 0.39     | 0.81     | 0.63     | 0.50     | 0.35     |
| <b>G+P</b>        | 0.68     | 1.24     | 0.45     | 0.29     | 0.84     | 0.70     | 0.54     | 0.24     | 0.35     |
| <b>Cs shRNA:</b>  | <b>1</b> | <b>2</b> | <b>3</b> | <b>4</b> | <b>5</b> | <b>6</b> | <b>7</b> | <b>8</b> | <b>9</b> |
| <b>P</b>          | 1.96     | 1.16     | 0.58     | 0.23     | 0.51     | 0.63     | 0.75     | 0.58     | 0.88     |
| <b>G+P</b>        | 0.33     | 1.24     | 1.15     | 0.27     | 0.19     | 0.43     | 3.20     | 0.91     | 0.30     |
